# Supplementary material for: Faith, Education, and Engagement: Community-Based Solutions to Substance Use in Immigrant Communities in Saskatchewan.
Source: Research Square preprint supplement (doi:10.21203/rs.3.rs-7746730/v1), 2025-11-11
Supplement: Supplementary file 1 [file 592113d19c344615b52c9d27.docx]

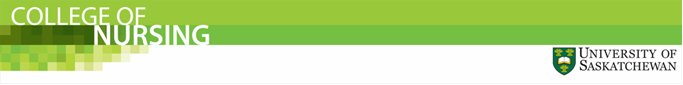


**Individual interview guide**

**Part 1- Sociodemographic attributes**

1. Age
2. Gender
3. When you moved to Canada
4. How did you immigrate to Canada?
5. Marital status
6. Level of education
7. Number of children?
8. Occupation
9. English proficiency
10. Languages spoken other than English
11. Which community do you belong?

**Part 2- research question 1: ow can the community stakeholders be best engaged to address the stigma of addiction and increase service utilization?**

1. How can you describe substance use issues in the community you come from?
   1. Who is affected?
   2. What substance they are using?
   3. How are they received by the community?
2. What do you think are the reasons community members are using substance?
3. How does substance use in your community affect
   1. Individuals?
   2. Families?
   3. Community?
4. What is substance use stigma like in your community?
5. What services are available for community members to prevent, and manage substance use issues?
   1. Do affected members utilize these services?
   2. What barriers do you think affect service utilization?

**Part 2: Research Question 2:**

1. How can the awareness of substance use and its impact be created?
2. What ways can substance use be prevented from causing negative impact to individuals?
3. What services are needed to prevent and manage substance use issues in your community?
4. How can addiction services be made accessible to the community?
5. What avenues are appropriate for implementing interventions for substance use targeting your community?
   1. Settlement agencies
   2. Ethnic associations?
